# Supplementary material for: Oxidant-templating fabrication of pure polypyrrole hydrogel beads as a highly efficient dye adsorbent
Source: Royal Society of Chemistry journal article supplement (doi:10.1039/c9ra00209j), 2019-01-01
Supplement: c9ra00209j1.pdf [file c9ra00209j1.pdf]

## Supporting Information

# Oxidant-Templating Fabrication of Pure Polypyrrole Hydrogel Beads as Highly Efficient Dye Adsorbent

Xi Ye<sup>a</sup>, Qingchi Xu<sup>ab\*</sup>, Jun Xu<sup>ab\*</sup>

<sup>a</sup> Department of Physics, Research Institute for Biomimetics and Soft Matter, Fujian Provincial Key Laboratory for Soft Functional Materials, Xiamen University, Xiamen, 361005, P. R. China.

<sup>b</sup>Jiujiang Research Institute of Xiamen University, Jiujiang 332000, P. R. China.

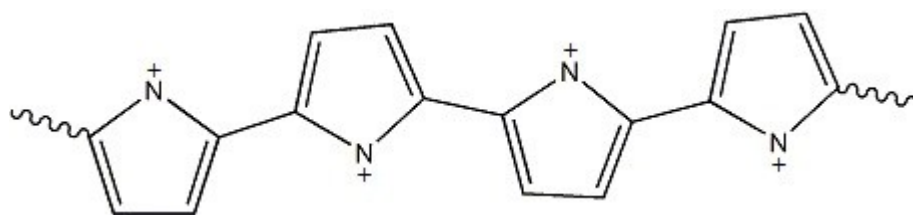

**Scheme. S1** Chemical structure of polypyrrole.

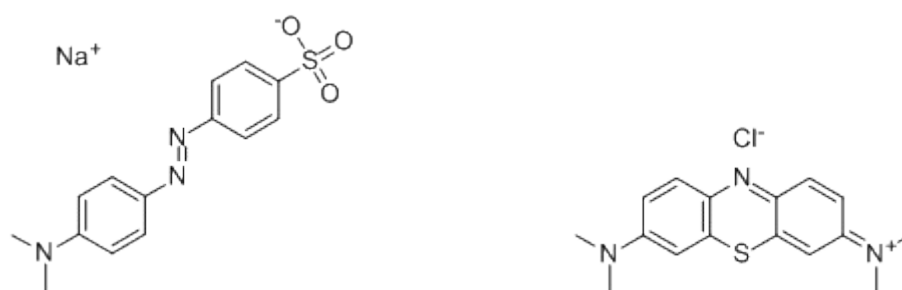

**Scheme.S2** Chemical structure of methyl orange (MO) and methylene blue (MB).

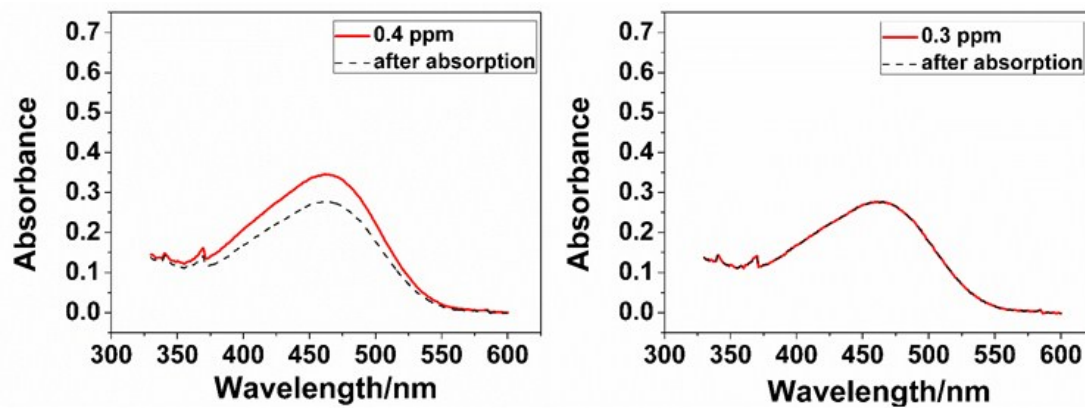

Fig. S1 UV-vis spectra of the MO solution before (dashed curves) and after (solid curves) absorption using PHG beads at the MO concentration of 0.4 ppm (left) and 0.3 ppm (right).

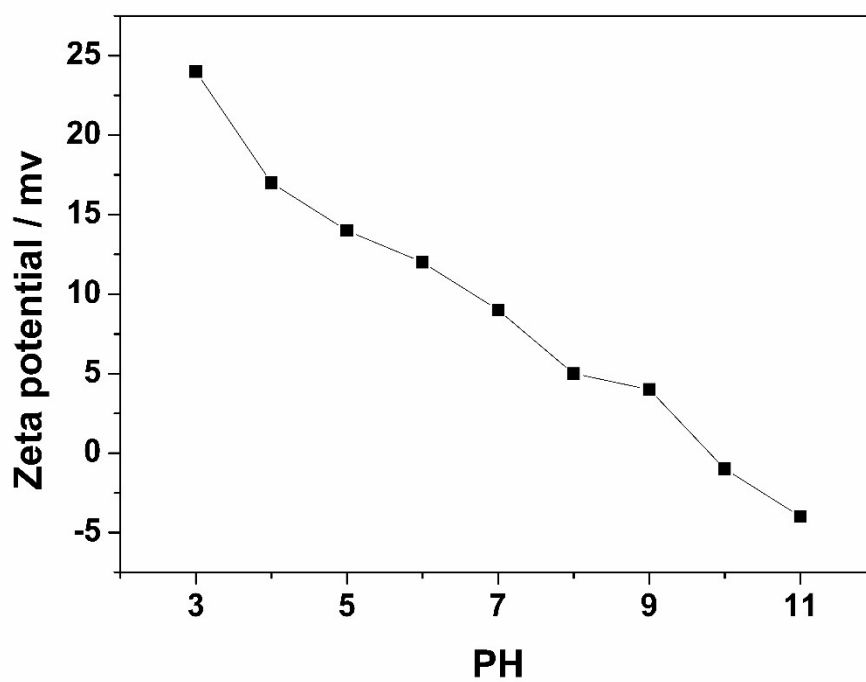

Fig. S2 Zeta potential of the PHG beads

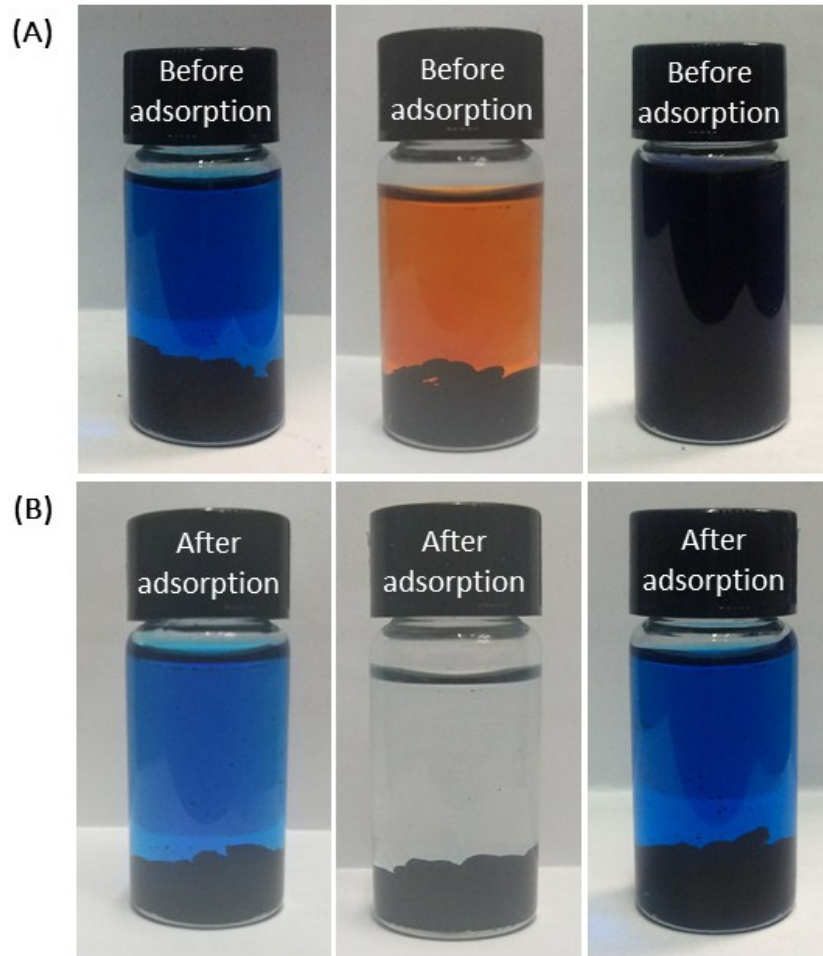

Fig. S3 The photographs of MB, MO, and MB/MO mixture solution before (A) and after (B) adsorption by the PHG beads.

Table S1. Summary of the adsorption kinetics the PHG beads using MO as dye model and the fitting results obtained based on Pseudo-first-order and Pseudo-second-order kinetics models.

|                                   |                                               | Pseudo first order                            |                                |       | Pseudo second order                           |                                          |       |
|-----------------------------------|-----------------------------------------------|-----------------------------------------------|--------------------------------|-------|-----------------------------------------------|------------------------------------------|-------|
| $C_a^0$<br>( $\text{mg g}^{-1}$ ) | $q_{e \text{ exp}}$<br>( $\text{mg g}^{-1}$ ) | $q_{e \text{ cal}}$<br>( $\text{mg g}^{-1}$ ) | $K_1$<br>( $\text{min}^{-1}$ ) | $R^2$ | $q_{e \text{ cal}}$<br>( $\text{mg g}^{-1}$ ) | $K_2(\text{g mg}^{-1} \text{ min}^{-1})$ | $R^2$ |
| 2                                 | 9.74                                          | 9.49                                          | 0.0916                         | 0.977 | 10.21                                         | 0.01299                                  | 0.979 |
| 5                                 | 24.40                                         | 23.81                                         | 0.1002                         | 0.972 | 25.46                                         | 0.00589                                  | 0.975 |
| 10                                | 48.84                                         | 46.23                                         | 0.0689                         | 0.984 | 50.48                                         | 0.00187                                  | 0.988 |

Table S2. Summary of the adsorption isotherms of the PHG beads using MO as dye model based on Langmuir and Freundlich models.

| Langmuir model              |                             |       | Freundlich model                                                   |                          |       |
|-----------------------------|-----------------------------|-------|--------------------------------------------------------------------|--------------------------|-------|
| $q_m$ (mg g <sup>-1</sup> ) | $k_L$ (L mg <sup>-1</sup> ) | $R^2$ | $K_F$ (mg g <sup>1-1/n</sup><br>g <sup>-1</sup> L <sup>1/n</sup> ) | 1/n (g L <sup>-1</sup> ) | $R^2$ |
| 236.9                       | 0.081                       | 0.998 | 11.3                                                               | 0.67                     | 0.963 |

Table S3. Comparison of the adsorption capacities of several adsorbents using MO as dye model

| Adsorbents                    | Adsorption capacity (mg g <sup>-1</sup> ) | Ref.      |
|-------------------------------|-------------------------------------------|-----------|
| Muli-walled CNT               | 35.4                                      | 1         |
| Activated carbon              | 11.2                                      | 2         |
| MIL-53                        | 57.9                                      | 3         |
| PED-MIL-101                   | 194                                       | 3         |
| NH <sub>2</sub> -MIL-101 (Al) | 188                                       | 4         |
| UiO-66                        | 73.5                                      | 5         |
| PPy nanofibers                | 169.55                                    | 6         |
| PPY hydrogel heads            | <b>236.9</b>                              | This work |

## Reference

1. B. Tanhaei, A. Ayati, M. Lahtinen and M. Sillanpää, *Chem. Eng. J.*, 2015, **259**, 1-10.
2. Y. Yao, B. He, F. Xu and X. Chen, *Chem. Eng. J.*, 2011, **170**, 82-89.
3. E. Haque, J. W. Jun and S. H. Jhung, *J. Hazard. Mater.*, 2011, **185**, 507-511.
4. E. Haque, J. E. Lee, I. T. Jang, Y. K. Hwang, J. S. Chang, J. Jegal and S. H. Jhung, *J. Hazard. Mater.*, 2010, **181**, 535-542.
5. E. Haque, V. Lo, A. I. Minett, A. T. Harris and T. L. Church, *J. Mater. Chem*, 2013, **2**, 193-203.
6. Q. Xin, J. Fu, Z. Chen, S. Liu, Y. Yan, J. Zhang and Q. Xu, *Journal of Environmental Chemical Engineering*, 2015, **3**, 1637-1647.
